# Supplementary material
Source: PubMed Central journal article supplement (PMC3292430)
Supplement: NIHMS357678-supplement-Supp_FigureS1-S6___TableS1.pdf [file NIHMS357678-supplement-Supp_FigureS1-S6___TableS1.pdf]

## Supplementary material

### 1. Antibodies, chemicals, cell culture supplies

Anti-CD68 (cat. # IMG80071) and anti-CD34 (cat. # IMG80073) monoclonal antibodies were from Imgenex. Anti- $\beta$ 3 integrin (cat. # MAB197Z), anti- $\beta$ 1 integrin (cat. # MAB17781), anti E-selectin (cat. # AF724), and anti-VCAM-1 (cat. # AF809) monoclonal antibodies were from R&D Systems. Anti-ICAM-1 monoclonal rabbit antibody was from Epitomics (cat. # 1929-1). Calcein-AM was obtained from BD Biosciences (cat. # 354216). Cell culture inserts were from Millipore. Kinase inhibitors LY294002 (cat. # 44024), SB20380 (cat. # 559398), PD98059 (cat. # 98059), FAK inhibitor II (cat. # 324878), and Rho kinase inhibitor (cat. # 55552) were obtained from Calbiochem. NF $\kappa$ B inhibitor BMS-345541 (cat. # B9935) was obtained from Sigma-Aldrich. Anti-human TF monoclonal antibody 6B4 was described previously (van den Berg et al, PNAS '09 and references therein). Anti-human fITF antibody 10H10 (mouse monoclonal) was previously described (van den Berg et al, PNAS '09 and references therein); custom anti-human fITF and anti-human asTF rabbit polyclonal antibodies were previously described (Tardos et al, JTH '08). Isotype control IgG (ChromPure grade) were obtained from Jackson ImmunoResearch.

### 2. Immunofluorescence studies.

Paraffin embedded specimens of human cervical adenocarcinoma and lipid-rich aortic plaques were used to study the co-localization of fITF, asTF, and CD68. Tissue sections were deparaffinized, blocked, and incubated with specific anti-fITF antibody 10H10 and specific polyclonal anti-asTF antibody for 3 hrs at RT. The slides were then washed and incubated with Alexa fluor-488 labeled goat anti-rabbit antibody and Alexa fluor-633 labeled goat anti-mouse

antibody (Invitrogen) for 1hr at RT. The slides were then extensively washed and incubated with phycoerythrin-labeled anti-CD68 antibody for 1hr at RT. The slides were further washed and mounted with vectashield containing DAPI (Vector Labs). Images were captured and pseudo-colored when needed to discriminate between asTF (green), flTF (purple), and CD68 (red).

### 3. RT-PCR

Total RNA was isolated using RNAeasy Kit (Qiagen), reverse transcribed using Transcriptor (Roche Diagnostics), and PCR-amplified using FastStart Taq polymerase (Roche Diagnostics). Amplicons were separated on 2% agarose and visualized using ethidium bromide. Real time qRT-PCR for E-selectin, VCAM-1, and ICAM-1 was performed using TaqMan probes from the Universal Probe Library, Roche Diagnostics.

### 4. Western blotting

MVEC were grown to confluence in 6-well plates, treated with asTF or vehicle control for 4 hrs, and then lysed directly in Laemmli sample buffer. Lysates were loaded on 10% SDS-PAGE gels and, following electrophoresis, transferred to PVDF membranes (Roche Diagnostics). Membranes were blocked with 2% dry skim milk in Tris-buffered saline/Tween-20 (TBST) overnight at 4°C, incubated with the primary antibodies against ICAM-1, VCAM-1, or E-selectin for 3 hrs at room temperature, washed in TBST, and then incubated with the corresponding HRP-conjugated secondary antibodies (Invitrogen) for 1 hr room temperature. Chemiluminescence was obtained using LumiLight (Roche Diagnostics). For the characterization of anti-human TF antibodies' reactivity and specificity, recombinant TF protein

variants and cervical cancer lysates, respectively, were probed with 6B4, 10H10, and custom polyclonal antibodies selectively recognizing flTF and asTF.

#### 5. Removal of N-His tag from recombinant asTF

Recombinant N-His tagged asTF was treated with 1U of rEnterokinase (rEK, Novagen) for 16 hrs at room temperature, following which rEK was removed using enterokinase cleavage-capture kit (Novagen). The asTF purity and MW were confirmed on 10% PAGE stained with Coomassie brilliant blue. Prior to experiments, asTF concentration was measured using Bradford microassay.

### Supplementary Figures

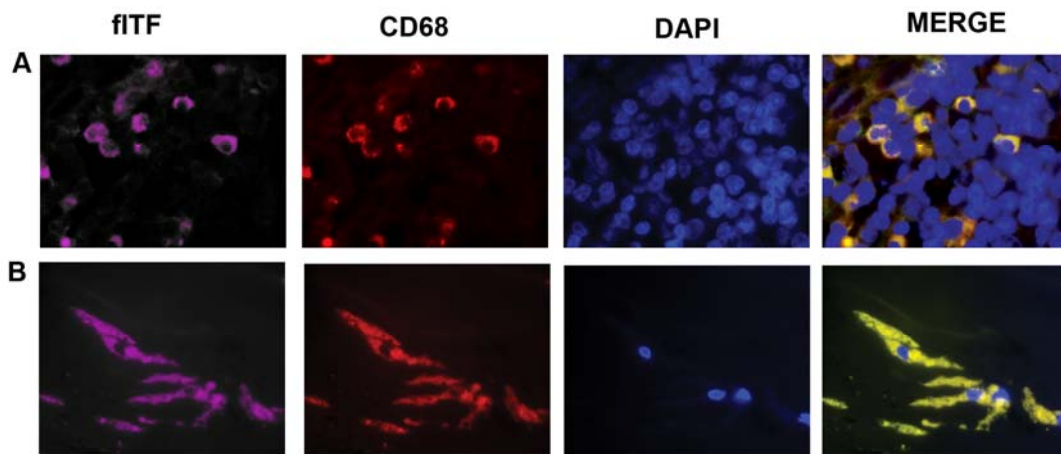

**Fig. S1.** Representative images, co-localization of flTF and CD68 in paraffin-embedded specimens of cervical cancers (A) and aortic plaques (B) assessed using flTF-specific rabbit polyclonal antibody and anti-CD68 monoclonal antibody. Following incubation with the primary antibodies, slides were washed, incubated with fluorophore-labeled corresponding secondary antibodies, and mounted with vectashield containing DAPI (Vector Labs). Visualization was performed in a Nikon-Photostat fluorescent microscope; images were captured using a CCD camera.

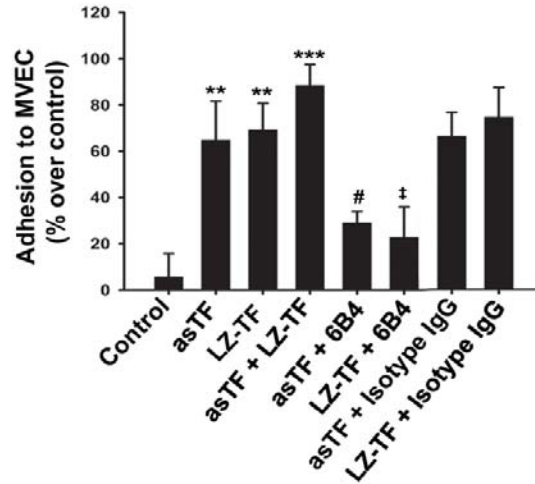

**Fig. S2.** LZ-TF and asTF promote MVEC-monocyte interactions via integrin ligation. Blockade of integrin binding by anti-TF antibody 6B4 inhibits MVEC-THP-1 interactions.  $n=3$  for each assay, the values are mean  $\pm$  SD. \*, \*\*, \*\*\*  $p<0.05$ ,  $p<0.01$  and  $p<0.001$ , respectively, compared to control. #  $p<0.05$  compared to asTF. ‡ and ††  $p<0.05$  and  $p<0.01$ , respectively, compared to LZ-TF.

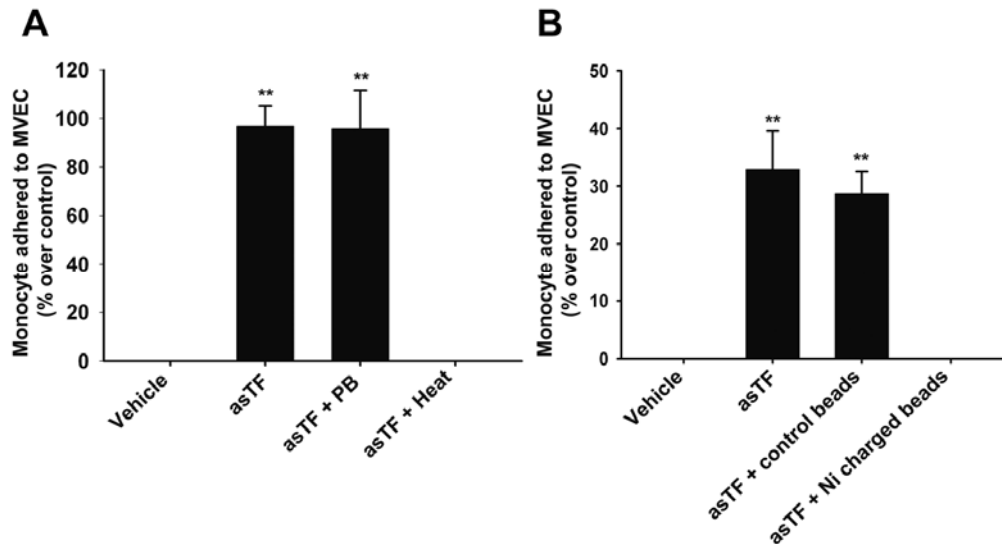

**Fig. S3.** (A) MVEC were treated with recombinant asTF, or pre-treated with Polymyxin B (“PB,” 50  $\mu$ g/ml) prior to the addition of recombinant asTF; in a separate sample, the medium containing recombinant asTF was heated and added to MVEC; monocyte-MVEC interactions were assessed using orbital shear assay. (B) Ni-charged and uncharged (control) beads were added to the medium containing recombinant asTF and placed on a rocker platform for 1 hr at room temperature; beads were removed by centrifugation and the medium was then added to MVEC. Monocyte-MVEC interactions were assessed using orbital shear assay. \*\* $p<0.001$ .

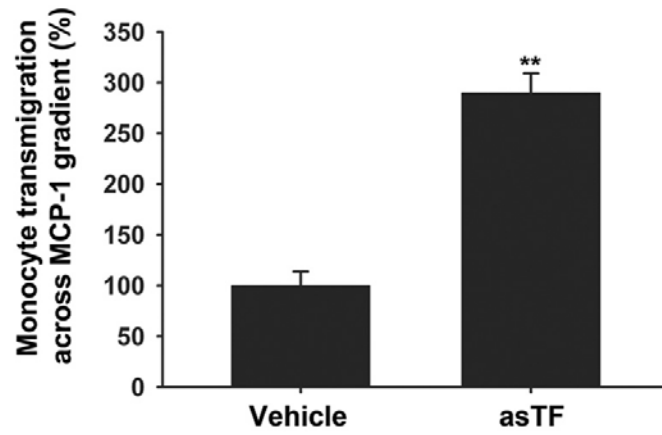

**Fig. S4.** Transwell assay under MCP-1 gradient (50  $\mu\text{g/L}$ ): THP-1 cells on the abluminal surface of the inserts chamber were stained with DAPI and counted using Image J (n=3, mean  $\pm$  SD, \*\*p<0.001).

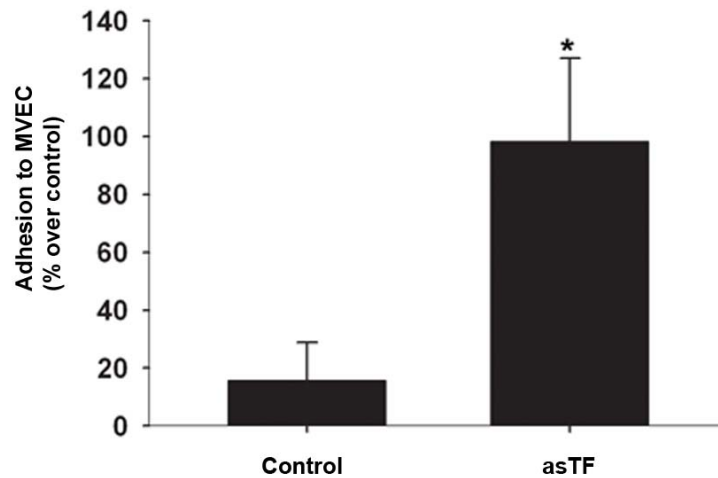

**Fig. S5.** Increased MVEC-monocyte adhesion elicited by recombinant asTF lacking the N-terminal His-tag, orbital shear assay. \* p< 0.01



## Supplementary Table

### Top 30% of the genes upregulated $\geq 1.5$ fold in cardiac and retinal MVEC in response to asTF stimulation

| S.no | Gene name (HUGO) | Gene Description                                                                   | Cardiac MVEC<br>Fold over control | Retinal MVEC<br>Fold over control |
|------|------------------|------------------------------------------------------------------------------------|-----------------------------------|-----------------------------------|
| 1    | <b>CCL20</b>     | chemokine (C-C motif) ligand 20                                                    | 30.4                              | 14.8                              |
| 2    | <b>TNFAIP6</b>   | tumor necrosis factor, alpha-induced protein 6                                     | 17.8                              | 5.6                               |
| 3    | <b>TNIP3</b>     | TNFAIP3 interacting protein 3                                                      | 17.8                              | 14.0                              |
| 4    | <b>CXCL3</b>     | chemokine (C-X-C motif) ligand 3                                                   | 16.3                              | 7.8                               |
| 5    | <b>TNFAIP3</b>   | tumor necrosis factor, alpha-induced protein 3                                     | 11.7                              | 5.3                               |
| 6    | <b>IL18R1</b>    | interleukin 18 receptor 1                                                          | 10.3                              | 4.6                               |
| 7    | <b>BIRC3</b>     | baculoviral IAP repeat-containing 3                                                | 9.9                               | 13.2                              |
| 8    | <b>IL1B</b>      | interleukin 1, beta                                                                | 9.8                               | 1.5                               |
| 9    | <b>HIVEP2</b>    | human immunodeficiency virus type I enhancer binding protein 2                     | 9.5                               | 3.9                               |
| 10   | <b>IL6</b>       | interleukin 6 (interferon, beta 2)                                                 | 9.3                               | 7.3                               |
| 11   | <b>CXCL2</b>     | chemokine (C-X-C motif) ligand 2                                                   | 9.0                               | 17.5                              |
| 12   | <b>IL8</b>       | interleukin 8                                                                      | 8.9                               | 12.2                              |
| 13   | <b>SELE</b>      | selectin E (endothelial adhesion molecule 1)                                       | 8.1                               | 108.4                             |
| 14   | <b>SLC7A2</b>    | solute carrier family 7 (cationic amino acid transporter, y+ system), member 2     | 7.2                               | 3.4                               |
| 15   | <b>RND1</b>      | Rho family GTPase 1                                                                | 6.1                               | 3.6                               |
| 16   | <b>MSC</b>       | musculin (activated B-cell factor-1)                                               | 6.1                               | 1.7                               |
| 17   | <b>CXCL1</b>     | chemokine (C-X-C motif) ligand 1 (melanoma growth stimulating activity, alpha)     | 5.9                               | 7.4                               |
| 18   | <b>VCAM1</b>     | vascular cell adhesion molecule 1                                                  | 5.4                               | 40.5                              |
| 19   | <b>CCL5</b>      | chemokine (C-C motif) ligand 5                                                     | 5.3                               | 2.2                               |
| 20   | <b>IL1A</b>      | interleukin 1, alpha                                                               | 5.1                               | 3.4                               |
| 21   | <b>CLEC2D</b>    | C-type lectin domain family 2, member D                                            | 4.8                               | 3.6                               |
| 22   | <b>NFKBIZ</b>    | nuclear factor of kappa light polypeptide gene enhancer in B-cells inhibitor, zeta | 4.7                               | 4.0                               |
| 23   | <b>ICAM1</b>     | intercellular adhesion molecule 1 (CD54), human rhinovirus receptor                | 4.6                               | 8.7                               |
| 24   | <b>TNFAIP2</b>   | tumor necrosis factor, alpha-induced protein 2                                     | 4.5                               | 2.4                               |
| 25   | <b>CSF2</b>      | colony stimulating factor 2 (granulocyte-macrophage)                               | 4.4                               | 2.8                               |
| 26   | <b>ELOVL7</b>    | ELOVL family member 7, elongation of long chain fatty acids (yeast)                | 4.3                               | 1.8                               |
| 27   | <b>SOD2</b>      | superoxide dismutase 2, mitochondrial                                              | 4.2                               | 4.4                               |
| 28   | <b>IFIH1</b>     | interferon induced with helicase C domain 1                                        | 4.1                               | 4.7                               |
| 29   | <b>EFNA1</b>     | ephrin-A1                                                                          | 4.1                               | 2.4                               |
| 30   | <b>RIPK2</b>     | receptor-interacting serine-threonine kinase 2                                     | 4.1                               | 3.4                               |
| 31   | <b>TNFRSF9</b>   | tumor necrosis factor receptor superfamily, member 9                               | 4.0                               | 2.4                               |
| 32   | <b>IRF1</b>      | interferon regulatory factor 1                                                     | 3.9                               | 1.5                               |
| 33   | <b>SLC41A2</b>   | solute carrier family 41, member 2                                                 | 3.9                               | 2.0                               |

|    |                 |                                                                                                                                    |     |     |
|----|-----------------|------------------------------------------------------------------------------------------------------------------------------------|-----|-----|
| 34 | <b>UBD</b>      | ubiquitin D                                                                                                                        | 3.9 | 2.2 |
| 35 | <b>CD69</b>     | CD69 molecule                                                                                                                      | 3.8 | 6.0 |
| 36 | <b>F3</b>       | coagulation factor III (thromboplastin, tissue factor)                                                                             | 3.8 | 2.0 |
| 37 | <b>CXCR7</b>    | chemokine (C-X-C motif) receptor 7                                                                                                 | 3.6 | 1.9 |
| 38 | <b>PTGS2</b>    | prostaglandin-endoperoxide synthase 2 (prostaglandin G/H synthase and cyclooxygenase)                                              | 3.6 | 2.9 |
| 39 | <b>TIFA</b>     | TRAF-interacting protein with a forkhead-associated domain                                                                         | 3.6 | 3.6 |
| 40 | <b>UBD</b>      | ubiquitin D                                                                                                                        | 3.5 | 2.1 |
| 41 | <b>ZC3H12C</b>  | zinc finger CCCH-type containing 12C                                                                                               | 3.4 | 2.6 |
| 42 | <b>IL7R</b>     | interleukin 7 receptor                                                                                                             | 3.4 | 2.4 |
| 43 | <b>TRAF1</b>    | TNF receptor-associated factor 1                                                                                                   | 3.3 | 1.8 |
| 44 | <b>FGF5</b>     | fibroblast growth factor 5                                                                                                         | 3.1 | 2.5 |
| 45 | <b>TNFAIP8</b>  | tumor necrosis factor, alpha-induced protein 8                                                                                     | 3.1 | 1.8 |
| 46 | <b>PDE5A</b>    | phosphodiesterase 5A, cGMP-specific                                                                                                | 3.0 | 1.9 |
| 47 | <b>NFKB1</b>    | nuclear factor of kappa light polypeptide gene enhancer in B-cells 1 (p105)                                                        | 3.0 | 2.6 |
| 48 | <b>BCL2A1</b>   | BCL2-related protein A1                                                                                                            | 3.0 | 2.9 |
| 49 | <b>IRAK2</b>    | interleukin-1 receptor-associated kinase 2                                                                                         | 2.9 | 2.0 |
| 50 | <b>NFKBIA</b>   | nuclear factor of kappa light polypeptide gene enhancer in B-cells inhibitor, alpha                                                | 2.9 | 3.6 |
| 51 | <b>CXCL6</b>    | chemokine (C-X-C motif) ligand 6 (granulocyte chemotactic protein 2)                                                               | 2.8 | 2.5 |
| 52 | <b>MAP3K8</b>   | mitogen-activated protein kinase kinase kinase 8                                                                                   | 2.8 | 2.1 |
| 53 | <b>IFIT3</b>    | interferon-induced protein with tetratricopeptide repeats 3                                                                        | 2.6 | 2.2 |
| 54 | <b>CNKSR3</b>   | CNKSR family member 3                                                                                                              | 2.5 | 2.2 |
| 55 | <b>ICOSLG</b>   | inducible T-cell co-stimulator ligand                                                                                              | 2.5 | 1.6 |
| 56 | <b>SDC4</b>     | syndecan 4                                                                                                                         | 2.5 | 2.7 |
| 57 | <b>CYLD</b>     | cyliindromatosis (turban tumor syndrome)                                                                                           | 2.4 | 2.1 |
| 58 | <b>WTAP</b>     | Wilms tumor 1 associated protein                                                                                                   | 2.4 | 1.5 |
| 59 | <b>CD83</b>     | CD83 molecule                                                                                                                      | 2.3 | 1.6 |
| 60 | <b>GBP4</b>     | guanylate binding protein 4                                                                                                        | 2.3 | 2.3 |
| 61 | <b>SERPINB2</b> | serpin peptidase inhibitor, clade B (ovalbumin), member 2                                                                          | 2.3 | 1.7 |
| 62 | <b>CSF1</b>     | colony stimulating factor 1 (macrophage)                                                                                           | 2.3 | 1.6 |
| 63 | <b>OSGIN2</b>   | oxidative stress induced growth inhibitor family member 2                                                                          | 2.3 | 1.5 |
| 64 | <b>RELB</b>     | v-rel reticuloendotheliosis viral oncogene homolog B, nuclear factor of kappa light polypeptide gene enhancer in B-cells 3 (avian) | 2.2 | 2.0 |
| 65 | <b>CLDN1</b>    | claudin 1                                                                                                                          | 2.2 | 1.9 |
| 66 | <b>CSF3</b>     | colony stimulating factor 3 (granulocyte)                                                                                          | 2.2 | 1.7 |
| 67 | <b>MMP10</b>    | matrix metalloproteinase 10 (stromelysin 2)                                                                                        | 2.2 | 2.2 |
| 68 | <b>IFIT2</b>    | interferon-induced protein with tetratricopeptide repeats 2                                                                        | 2.1 | 2.6 |
| 69 | <b>DRAM</b>     | damage-regulated autophagy modulator                                                                                               | 2.0 | 1.5 |
| 70 | <b>CCL2</b>     | chemokine (C-C motif) ligand 2                                                                                                     | 2.0 | 6.7 |
| 71 | <b>CTSS</b>     | cathepsin S                                                                                                                        | 2.0 | 1.8 |
